# Supplementary material for: Re-assembly, quality evaluation, and annotation of 678 microbial eukaryotic reference transcriptomes
Source: PubMed Central journal article supplement (PMC6481552; doi:10.1093/gigascience/giy158), 2018-12-13

# GigaScience

## Re-assembly, quality evaluation, and annotation of 678 microbial eukaryotic reference transcriptomes --Manuscript Draft--

|                                                      |                                                                                                                                                                                                                                                                                                                                                                                                                                                                                                                                                                                                                                                                                                                                                                                                                                                                                                                                                                                                                                                                                                                                                                                                                                                                                                                                                                                                                                                                                                                                                                                                                                                                                                                                                                                                                                                                                                                                                                                                                                                                                    |                    |
|------------------------------------------------------|------------------------------------------------------------------------------------------------------------------------------------------------------------------------------------------------------------------------------------------------------------------------------------------------------------------------------------------------------------------------------------------------------------------------------------------------------------------------------------------------------------------------------------------------------------------------------------------------------------------------------------------------------------------------------------------------------------------------------------------------------------------------------------------------------------------------------------------------------------------------------------------------------------------------------------------------------------------------------------------------------------------------------------------------------------------------------------------------------------------------------------------------------------------------------------------------------------------------------------------------------------------------------------------------------------------------------------------------------------------------------------------------------------------------------------------------------------------------------------------------------------------------------------------------------------------------------------------------------------------------------------------------------------------------------------------------------------------------------------------------------------------------------------------------------------------------------------------------------------------------------------------------------------------------------------------------------------------------------------------------------------------------------------------------------------------------------------|--------------------|
| <b>Manuscript Number:</b>                            | GIGA-D-18-00191                                                                                                                                                                                                                                                                                                                                                                                                                                                                                                                                                                                                                                                                                                                                                                                                                                                                                                                                                                                                                                                                                                                                                                                                                                                                                                                                                                                                                                                                                                                                                                                                                                                                                                                                                                                                                                                                                                                                                                                                                                                                    |                    |
| <b>Full Title:</b>                                   | Re-assembly, quality evaluation, and annotation of 678 microbial eukaryotic reference transcriptomes                                                                                                                                                                                                                                                                                                                                                                                                                                                                                                                                                                                                                                                                                                                                                                                                                                                                                                                                                                                                                                                                                                                                                                                                                                                                                                                                                                                                                                                                                                                                                                                                                                                                                                                                                                                                                                                                                                                                                                               |                    |
| <b>Article Type:</b>                                 | Research                                                                                                                                                                                                                                                                                                                                                                                                                                                                                                                                                                                                                                                                                                                                                                                                                                                                                                                                                                                                                                                                                                                                                                                                                                                                                                                                                                                                                                                                                                                                                                                                                                                                                                                                                                                                                                                                                                                                                                                                                                                                           |                    |
| <b>Funding Information:</b>                          | Gordon and Betty Moore Foundation (GBMF4551)                                                                                                                                                                                                                                                                                                                                                                                                                                                                                                                                                                                                                                                                                                                                                                                                                                                                                                                                                                                                                                                                                                                                                                                                                                                                                                                                                                                                                                                                                                                                                                                                                                                                                                                                                                                                                                                                                                                                                                                                                                       | Dr. C. Titus Brown |
| <b>Abstract:</b>                                     | <p>Background: De novo transcriptome assemblies are required prior to analyzing RNAseq data from a species without an existing reference genome or transcriptome. Despite the prevalence of transcriptomic studies, the effects of using different workflows, or 'pipelines', on the resulting assemblies are poorly understood. Here, a pipeline was programmatically automated and used to assemble and annotate raw transcriptomic short read data collected by the Marine Microbial Eukaryotic Transcriptome Sequencing Project (MMETSP). Transcriptome assemblies generated through this pipeline were evaluated and compared against assemblies that were previously generated with a pipeline developed by the National Center for Genome Research (NCGR). Findings: New transcriptome assemblies contained 70% of the previous contigs as well as new content. On average, 7.8% of the annotated contigs in the new assemblies were novel gene names not found in the previous assemblies. Taxonomic trends were observed in the assembly metrics, with assemblies from the Dinoflagellata and Ciliophora phyla showing a higher percentage of open reading frames and number of contigs than transcriptomes from other phyla. Conclusions: Given current bioinformatics approaches, there is no single 'best' reference transcriptome for a particular set of raw data. As the optimum transcriptome is a moving target, improving (or not) with new tools and approaches, automated and programmable pipelines are invaluable for managing the computationally-intensive tasks required for re-processing large sets of samples with revised pipelines. Moreover, automated and programmable pipelines facilitate the comparison of diverse sets of data by ensuring a common evaluation workflow was applied to all samples. Thus, re-assembling existing data with new tools using automated and programmable pipelines may yield more accurate identification of taxon-specific trends across samples in addition to novel and useful products for the community.</p> |                    |
| <b>Corresponding Author:</b>                         | C. Titus Brown<br>UC Davis<br>Davis, CA UNITED STATES                                                                                                                                                                                                                                                                                                                                                                                                                                                                                                                                                                                                                                                                                                                                                                                                                                                                                                                                                                                                                                                                                                                                                                                                                                                                                                                                                                                                                                                                                                                                                                                                                                                                                                                                                                                                                                                                                                                                                                                                                              |                    |
| <b>Corresponding Author Secondary Information:</b>   |                                                                                                                                                                                                                                                                                                                                                                                                                                                                                                                                                                                                                                                                                                                                                                                                                                                                                                                                                                                                                                                                                                                                                                                                                                                                                                                                                                                                                                                                                                                                                                                                                                                                                                                                                                                                                                                                                                                                                                                                                                                                                    |                    |
| <b>Corresponding Author's Institution:</b>           | UC Davis                                                                                                                                                                                                                                                                                                                                                                                                                                                                                                                                                                                                                                                                                                                                                                                                                                                                                                                                                                                                                                                                                                                                                                                                                                                                                                                                                                                                                                                                                                                                                                                                                                                                                                                                                                                                                                                                                                                                                                                                                                                                           |                    |
| <b>Corresponding Author's Secondary Institution:</b> |                                                                                                                                                                                                                                                                                                                                                                                                                                                                                                                                                                                                                                                                                                                                                                                                                                                                                                                                                                                                                                                                                                                                                                                                                                                                                                                                                                                                                                                                                                                                                                                                                                                                                                                                                                                                                                                                                                                                                                                                                                                                                    |                    |
| <b>First Author:</b>                                 | Lisa Kristine Johnson                                                                                                                                                                                                                                                                                                                                                                                                                                                                                                                                                                                                                                                                                                                                                                                                                                                                                                                                                                                                                                                                                                                                                                                                                                                                                                                                                                                                                                                                                                                                                                                                                                                                                                                                                                                                                                                                                                                                                                                                                                                              |                    |
| <b>First Author Secondary Information:</b>           |                                                                                                                                                                                                                                                                                                                                                                                                                                                                                                                                                                                                                                                                                                                                                                                                                                                                                                                                                                                                                                                                                                                                                                                                                                                                                                                                                                                                                                                                                                                                                                                                                                                                                                                                                                                                                                                                                                                                                                                                                                                                                    |                    |
| <b>Order of Authors:</b>                             | Lisa Kristine Johnson                                                                                                                                                                                                                                                                                                                                                                                                                                                                                                                                                                                                                                                                                                                                                                                                                                                                                                                                                                                                                                                                                                                                                                                                                                                                                                                                                                                                                                                                                                                                                                                                                                                                                                                                                                                                                                                                                                                                                                                                                                                              |                    |
|                                                      | Harriet Alexander                                                                                                                                                                                                                                                                                                                                                                                                                                                                                                                                                                                                                                                                                                                                                                                                                                                                                                                                                                                                                                                                                                                                                                                                                                                                                                                                                                                                                                                                                                                                                                                                                                                                                                                                                                                                                                                                                                                                                                                                                                                                  |                    |
|                                                      | C. Titus Brown                                                                                                                                                                                                                                                                                                                                                                                                                                                                                                                                                                                                                                                                                                                                                                                                                                                                                                                                                                                                                                                                                                                                                                                                                                                                                                                                                                                                                                                                                                                                                                                                                                                                                                                                                                                                                                                                                                                                                                                                                                                                     |                    |
| <b>Order of Authors Secondary Information:</b>       |                                                                                                                                                                                                                                                                                                                                                                                                                                                                                                                                                                                                                                                                                                                                                                                                                                                                                                                                                                                                                                                                                                                                                                                                                                                                                                                                                                                                                                                                                                                                                                                                                                                                                                                                                                                                                                                                                                                                                                                                                                                                                    |                    |
| <b>Additional Information:</b>                       |                                                                                                                                                                                                                                                                                                                                                                                                                                                                                                                                                                                                                                                                                                                                                                                                                                                                                                                                                                                                                                                                                                                                                                                                                                                                                                                                                                                                                                                                                                                                                                                                                                                                                                                                                                                                                                                                                                                                                                                                                                                                                    |                    |
| <b>Question</b>                                      | <b>Response</b>                                                                                                                                                                                                                                                                                                                                                                                                                                                                                                                                                                                                                                                                                                                                                                                                                                                                                                                                                                                                                                                                                                                                                                                                                                                                                                                                                                                                                                                                                                                                                                                                                                                                                                                                                                                                                                                                                                                                                                                                                                                                    |                    |

|                                                                                                                                                                                                                                                                                                                                                                                                                                                                                                                                                         |            |
|---------------------------------------------------------------------------------------------------------------------------------------------------------------------------------------------------------------------------------------------------------------------------------------------------------------------------------------------------------------------------------------------------------------------------------------------------------------------------------------------------------------------------------------------------------|------------|
| <p>Are you submitting this manuscript to a special series or article collection?</p>                                                                                                                                                                                                                                                                                                                                                                                                                                                                    | <p>No</p>  |
| <p><b>Experimental design and statistics</b></p> <p>Full details of the experimental design and statistical methods used should be given in the Methods section, as detailed in our <a href="#">Minimum Standards Reporting Checklist</a>. Information essential to interpreting the data presented should be made available in the figure legends.</p> <p>Have you included all the information requested in your manuscript?</p>                                                                                                                      | <p>Yes</p> |
| <p><b>Resources</b></p> <p>A description of all resources used, including antibodies, cell lines, animals and software tools, with enough information to allow them to be uniquely identified, should be included in the Methods section. Authors are strongly encouraged to cite <a href="#">Research Resource Identifiers</a> (RRIDs) for antibodies, model organisms and tools, where possible.</p> <p>Have you included the information requested as detailed in our <a href="#">Minimum Standards Reporting Checklist</a>?</p>                     | <p>Yes</p> |
| <p><b>Availability of data and materials</b></p> <p>All datasets and code on which the conclusions of the paper rely must be either included in your submission or deposited in <a href="#">publicly available repositories</a> (where available and ethically appropriate), referencing such data using a unique identifier in the references and in the “Availability of Data and Materials” section of your manuscript.</p> <p>Have you have met the above requirement as detailed in our <a href="#">Minimum Standards Reporting Checklist</a>?</p> | <p>Yes</p> |

[Click here to view linked References](#)

1  
2  
3  
4  
5  
6  
7  
8  
9  
10  
11  
12  
13  
14  
15  
16  
17  
18  
19  
20  
21  
22  
23  
24  
25  
26  
27  
28  
29  
30  
31  
32  
33  
34  
35  
36  
37  
38  
39  
40  
41  
42  
43  
44  
45  
46  
47  
48  
49  
50  
51  
52  
53  
54  
55  
56  
57  
58  
59  
60  
61  
62  
63  
64  
65

1 **Re-assembly, quality evaluation, and annotation of 678 microbial eukaryotic reference**  
2 **transcriptomes**

3  
4 Lisa K. Johnson<sup>1,2</sup>, Harriet Alexander<sup>1</sup>, C. Titus Brown<sup>1,2,3\*</sup>

5  
6 <sup>1</sup> Department of Population Health and Reproduction, School of Veterinary Medicine, University  
7 of California, Davis

8 <sup>2</sup> Molecular, Cellular, and Integrative Physiology Graduate Group, University of California,  
9 Davis

10 <sup>3</sup> Genome Center, University of California, Davis

11 \* Correspondence: [ctbrown@ucdavis.edu](mailto:ctbrown@ucdavis.edu)  
12  
13

1  
2  
3  
4  
5  
6  
7  
8  
9  
10  
11  
12  
13  
14  
15  
16  
17  
18  
19  
20  
21  
22  
23  
24  
25  
26  
27  
28  
29  
30  
31  
32  
33  
34  
35  
36  
37  
38  
39  
40  
41  
42  
43  
44  
45  
46  
47  
48  
49  
50  
51  
52  
53  
54  
55  
56  
57  
58  
59  
60  
61  
62  
63  
64  
65

**Abstract**

**Background**

*De novo* transcriptome assemblies are required prior to analyzing RNAseq data from a species without an existing reference genome or transcriptome. Despite the prevalence of transcriptomic studies, the effects of using different workflows, or “pipelines”, on the resulting assemblies are poorly understood. Here, a pipeline was programmatically automated and used to assemble and annotate raw transcriptomic short read data collected by the Marine Microbial Eukaryotic Transcriptome Sequencing Project (MMETSP). Transcriptome assemblies generated through this pipeline were evaluated and compared against assemblies that were previously generated with a pipeline developed by the National Center for Genome Research (NCGR).

**Findings**

New transcriptome assemblies contained 70% of the previous contigs as well as new content. On average,  $7.8 \pm 0.19\%$  of the annotated contigs in the new assemblies were novel gene names not found in the previous assemblies. Taxonomic trends were observed in the assembly metrics, with assemblies from the Dinoflagellata and Ciliophora phyla showing a higher percentage of open reading frames and number of contigs than transcriptomes from other phyla.

**Conclusions**

Given current bioinformatics approaches, there is no single ‘best’ reference transcriptome for a particular set of raw data. As the optimum transcriptome is a moving target, improving (or not) with new tools and approaches, automated and programmable pipelines are invaluable for managing the computationally-intensive tasks required for re-processing large sets of samples with revised pipelines. Moreover, automated and programmable pipelines facilitate the comparison of diverse sets of data by ensuring a common evaluation workflow was applied to all samples. Thus, re-assembling existing data with new tools using automated and programmable pipelines may yield more accurate identification of taxon-specific trends across samples in addition to novel and useful products for the community.

## 45 Introduction

46  
47 The analysis of gene expression from high-throughput nucleic acid sequence data relies on the  
48 presence of a high quality reference genome or transcriptome. When there is no reference  
49 genome or transcriptome for an organism of interest, raw RNA sequence data (RNAseq) must be  
50 assembled *de novo* into a transcriptome [1]. This type of analysis is ubiquitous across many  
51 fields. For example, evolutionary developmental biology [2], cancer biology [3], agriculture  
52 [4,5], ecological physiology [6,7], and biological oceanography [8]. In recent years, substantial  
53 investments have been made in data generation, primary data analysis, and development of  
54 downstream applications, such as biomarkers and diagnostic tools [9–16].

55 Methods for *de novo* RNAseq assembly of the most common short read Illumina sequencing data  
56 continue to evolve rapidly, especially for non-model species [17]. At this time, there are several  
57 major *de novo* transcriptome assembly software tools available to choose from, including Trinity  
58 [18], SOAPdenovo-Trans [19], Trans-ABYSS [20], Oases [21], SPAdes [22], IDBA-tran [23],  
59 and Shannon [24]. The availability of these options stems from continued research into the  
60 unique computational challenges associated with transcriptome assembly of short read Illumina  
61 RNAseq data, including large memory requirements, alternative splicing and allelic variants  
62 [18,25].

63 The continuous development of new tools and workflows for RNAseq analysis combined with  
64 the vast amount of publicly available RNAseq data [26] raises the opportunity to re-analyze  
65 existing data with new tools. This, however, is rarely done systematically. To evaluate the  
66 performance impact of new tools on old data, we developed and applied a programmatically  
67 automated *de novo* transcriptome assembly workflow that is modularized and extensible based  
68 on the Eel Pond Protocol [27]. This workflow incorporates Trimmomatic [28], digital  
69 normalization with khmer software [29,30], and the Trinity *de novo* transcriptome assembler  
70 [18].

71  
72 To evaluate this pipeline, we re-analyzed RNAseq data from 678 samples generated as part of  
73 the Marine Microbial Eukaryotic Transcriptome Sequencing Project (MMETSP). The MMETSP  
74 RNAseq data set was generated to broaden the diversity of sequenced marine protists to enhance  
75 our understanding of their evolution and roles in marine ecosystems and biogeochemical cycles  
76 [31,32]. With data from species spanning more than 40 eukaryotic phyla, the MMETSP provides  
77 one of the largest publicly-available collections of RNAseq data from a diversity of species.  
78 Moreover, the MMETSP used a standardized library preparation procedure and all of the  
79 samples were sequenced at the same facility, making this data set unusually comparable.

80  
81 Reference transcriptomes for the MMETSP were originally assembled by the National Center for  
82 Genome Research (NCGR) with a pipeline which used the Trans-ABYSS software program [31]  
83 to assemble the short reads. The transcriptomes generated from the NCGR pipeline have already  
84 facilitated discoveries in the evolutionary history of ecologically significant genes [33,34],  
85 differential gene expression under shifting environmental conditions [8,35], inter-group  
86 transcriptome comparisons [36], unique transcriptional features [37–39], and meta-  
87 transcriptomic studies [34–36].  
88

1  
2  
3  
4 89 In re-assembling the MMETSP data, we sought to compare and improve the original MMETSP  
5 90 reference transcriptome and to create a platform which facilitates automated re-assembly and  
6 91 evaluation. Here, we show that our re-assemblies had higher evaluation metrics and contained  
7 92 most of the NCGR contigs as well as adding new content.  
8 93

## 94 **Methods**

### 95 *Programmatically Automated Pipeline*

96  
97  
98 An automated pipeline was developed to execute the steps of the Eel Pond mRNAseq Protocol  
99 [27], a lightweight protocol for assembling short Illumina RNA-seq reads that uses the Trinity *de*  
100 *novo* transcriptome assembler. This protocol generates *de novo* transcriptome assemblies of  
101 acceptable quality [43]. The pipeline was used to assemble all of the data from the MMETSP  
102 (Figure 1). The code and instructions for running the pipeline are available at  
103 <https://doi.org/10.5281/zenodo.249982>.  
104

105 The steps of the pipeline applied to the MMETSP are as follows:

#### 106 1. Download the raw data

107  
108  
109 Raw RNA-seq data sets were obtained from the National Center for Biotechnology Information  
110 (NCBI) Sequence Read Archive (SRA) from BioProject PRJNA231566. Data were paired-end  
111 (PE) Illumina reads with lengths of 50 bases for each read. A metadata (SraRunInfo.csv) file  
112 obtained from the SRA web interface was used to provide a list of samples to the *get\_data.py*  
113 pipeline script, which was then used to download and extract fastq files from 719 records. The  
114 script uses the fastq-dump program from the SRA Toolkit to extract the SRA-formatted fastq  
115 files (version 2.5.4) [44]. There were 18 MMETSP samples with more than one SRA record  
116 (MMETSP0693, MMETSP1019, MMETSP0923, MMETSP0008, MMETSP1002,  
117 MMETSP1325, MMETSP1018, MMETSP1346, MMETSP0088, MMETSP0092,  
118 MMETSP0717, MMETSP0223, MMETSP0115, MMETSP0196, MMETSP0197,  
119 MMETSP0398, MMETSP0399, MMETSP0922). In these cases, reads from multiple SRA  
120 records were concatenated together per sample. Taking these redundancies into consideration,  
121 there were a total of 678 re-assemblies generated from the 719 records in PRJNA231566  
122 (Supplemental Notebook 1). Assembly evaluation metrics were not calculated for MMETSP  
123 samples with more than one SRA record because these assemblies were different than the others,  
124 containing multiple samples, and thus not as comparable.  
125

126 Initial transcriptomes that were assembled by the National Center for Genome Resources  
127 (NCGR), using methods and data described in the original publication [31], were downloaded  
128 from the iMicrobe repository to compare with our re-assemblies  
129 (<ftp://ftp.imicrobe.us/projects/104/>). There were two versions of each assembly, ‘nt’ and ‘cds’.  
130 The version used for comparison is noted below in each evaluation step. To our knowledge, the  
131 NCGR took extra post-processing steps to filter content, leaving only coding sequences in the  
132 ‘cds’ versions of each assembly [31].  
133

#### 134 2. Perform quality control

135  
136  
137  
138  
139  
140  
141  
142  
143  
144  
145  
146  
147  
148  
149  
150  
151  
152  
153  
154  
155  
156  
157  
158  
159  
160  
161  
162  
163  
164  
165

1  
2  
3  
4  
5  
6  
7  
8  
9  
10  
11  
12  
13  
14  
15  
16  
17  
18  
19  
20  
21  
22  
23  
24  
25  
26  
27  
28  
29  
30  
31  
32  
33  
34  
35  
36  
37  
38  
39  
40  
41  
42  
43  
44  
45  
46  
47  
48  
49  
50  
51  
52  
53  
54  
55  
56  
57  
58  
59  
60  
61  
62  
63  
64  
65

135  
136 Reads were analyzed with FastQC (version 0.11.5) and multiqc (version 1.2) [45] to confirm  
137 overall qualities before and after trimming. A conservative trimming approach [46] was used  
138 with Trimmomatic (version 0.33) [28] to remove residual Illumina adapters and cut bases off the  
139 start (LEADING) and end (TRAILING) of reads if they were below a threshold Phred quality  
140 score ( $Q < 2$ ).

### 141 142 3. Apply digital normalization

143  
144 To decrease the memory requirements for each assembly, reads were interleaved, normalized to  
145 a  $k$ -mer ( $k = 20$ ) coverage of 20 and a memory size of 4e9, then low-abundance  $k$ -mers from  
146 reads with a coverage above 18 were trimmed. Orphaned reads, where the mated pair was  
147 removed during normalization, were included in the assembly.

### 148 149 4. Assemble

150  
151 Transcriptomes were assembled from normalized reads with Trinity 2.2.0 using default  
152 parameters ( $k = 25$ ).

153  
154 The resulting assemblies are referred to below as the “Lab for Data Intensive Biology”  
155 assemblies, or DIB assemblies. The original assemblies are referred to as the NCGR assemblies.

### 156 157 5. Post-assembly assessment

158  
159 Transcriptomes were annotated using the dammit pipeline (Scott 2016), which relies on the  
160 following databases as evidence: Pfam-A [47], Rfam [48], OrthoDB [49]. In the case where there  
161 were multiple database hits, one gene name per contig was selected by choosing the name of the  
162 lowest e-value match ( $< 1e-05$ ).

163  
164 All assemblies were evaluated using metrics generated by the Transrate program [50]. Trimmed  
165 reads were used to calculate a Transrate score for each assembly, which represents the geometric  
166 mean of all contig scores multiplied by the proportion of input reads providing positive support  
167 for the assembly [50]. Comparative metrics were calculated using Transrate for each MMETSP  
168 sample between DIB and the NCGR assemblies using the Conditional Reciprocal Best BLAST  
169 hits (CRBB) algorithm [51]. A forward comparison was made with the NCGR assembly used as  
170 the reference and each DIB re-assembly as the query. Reverse comparative metrics were  
171 calculated with each DIB re-assembly as the reference and the NCGR assembly as the query.  
172 Transrate scores were calculated for each assembly using the Trimmomatic quality-trimmed  
173 reads, prior to digital normalization.

174  
175 Benchmarking Universal Single-Copy Orthologs (BUSCO) software (version 3) was used with a  
176 database of 234 orthologous genes specific to protistans and 306 genes specific to eukaryota with  
177 open reading frames in the assemblies. BUSCO scores are frequently used as one measure of  
178 assembly completeness [52].

179

1  
2  
3  
4 180 To assess the occurrences of fixed-length words in the assemblies, unique 25-mers were  
5 181 measured in each assembly using the HyperLogLog estimator of cardinality built into the khmer  
6 182 software package [53].  
7 183

8 184 Unique gene names were compared from a random subset of 296 samples using the dammit  
9 185 annotation pipeline [54]. If a gene name was annotated in NCGR but not in DIB, this was  
10 186 considered a gene uniquely annotated in NCGR. Unique gene names were normalized to the total  
11 187 number of annotated genes in each assembly.  
12 188

13 189 A Tukey's honest significant different (HSD) post-hoc range test of multiple pairwise  
14 190 comparisons was used in conjunction with an ANOVA to measure differences between  
15 191 distributions of data from the top eight most-represented phyla ("Bacillariophyta", "Dinophyta",  
16 192 "Ochrophyta", "Haptophyta", "Ciliophora", "Chlorophyta", "Cryptophyta", "Others") using the  
17 193 'agricolae' package version 1.2-8 in R version 3.4.2 (2017-09-28). Margins sharing a letter in  
18 194 the group label are not significantly different at the 5% level (Figure 8). Averages are reported  $\pm$   
19 195 standard deviation.  
20 196

## 21 197 **Results**

22 198  
23 199 After assemblies and annotations were completed, files were uploaded to Figshare and Zenodo  
24 200 are available for download [55,56]. Due to obstacles encountered uploading and maintaining 678  
25 201 assemblies on Figshare, Zenodo will be the long-term archive for these re-assemblies  
26 202 <http://doi.org/10.5281/zenodo.1212585>.  
27 203

28 204 *Differences in available evaluation metrics between NCGR and DIB were variable.*  
29 205

30 206 The majority of transcriptome evaluation metrics collected for each sample were higher in  
31 207 Trinity-based DIB re-assemblies than for the Trans-ABYSS-based NCGR assemblies (Table 1),  
32 208 with the exception being the Transrate score from the "nt" version of the assembly. The  
33 209 Transrate score with this 'cds' version was higher in DIB compared to NCGR but lower in DIB  
34 210 compared to the NCGR 'nt' version (Supplemental Figure 1).  
35 211

36 212 The DIB re-assemblies had more contigs than the NCGR assemblies in 83.5% of the samples  
37 213 (Table 1). The mean number of contigs in the DIB re-assemblies was  $48,361 \pm 35,703$  while the  
38 214 mean number of contigs in the NCGR 'nt' assemblies was  $30,532 \pm 21,353$  (Figure 2). A two-  
39 215 sample Kolmogorov-Smirnov test comparing distributions indicated that the number of contigs  
40 216 were significantly different between DIB and NCGR assemblies ( $p < 0.001$ ,  $D = 0.35715$ ).  
41 217 Transrate scores [35], which calculate the overall quality of the assembly based on the original  
42 218 reads, were significantly higher in the DIB re-assemblies ( $0.31 \pm 0.1$ ) compared to the 'cds'  
43 219 versions of the NCGR assemblies ( $0.22 \pm 0.09$ ) ( $p < 0.001$ ,  $D = 0.49899$ ). The Transrate scores  
44 220 in the NCGR 'nt' assemblies ( $0.35 \pm 0.09$ ) were significantly higher than the DIB assemblies  
45 221 ( $0.22 \pm 0.09$ ) ( $p < 0.001$ ,  $D = 0.22475$ ) (Supplemental Figure 1). The frequency of the  
46 222 differences between Transrate scores in the NCGR 'nt' assemblies and the DIB re-assemblies  
47 223 appears to be normally distributed (Figure 2C). Transrate scores from the DIB assemblies  
48 224 relative to the NCGR 'nt' assemblies did not appear to have taxonomic trends (Supplemental  
49 225 Figure 2).  
50  
51  
52  
53  
54  
55  
56  
57  
58  
59  
60  
61  
62  
63  
64  
65



1  
2  
3  
4 226  
5 227 *The DIB re-assemblies contained most of the NCGR contigs as well as new content.*  
6  
7 228

8 229 We applied CRBB to evaluate overlap between the assemblies. A positive CRBB result indicates  
9 230 that one assembly contains the same contig information as the other. Thus, the proportion of  
10 231 positive CRBB hits can be used as a scoring metric to compare the relative similarity of content  
11 232 between two assemblies. For example, MMETSP0949 (*Chattonella subsalsa*) had 39,051 contigs  
12 233 and a CRBB score of 0.71 in the DIB re-assembly whereas in the NCGR assembly of the same  
13 234 sample had 18,873 contigs and a CRBB score of 0.34. This indicated that 71% of the reference  
14 235 of DIB was covered by the NCGR assembly, whereas in the reverse alignment, the NCGR  
15 236 reference assembly was only covered by 34% of the DIB re-assembly. The mean CRBB score in  
16 237 DIB when queried against NCGR 'nt' as a reference was  $0.70 \pm 0.22$ , while the mean proportion  
17 238 for NCGR 'nt' assemblies queried against DIB re-assemblies was  $0.49 \pm 0.10$  ( $p < 0.001$ ,  $D =$   
18 239  $0.71121$ ) (Figure 3). This indicates that more content from the NCGR assemblies was included in  
19 240 the DIB re-assemblies than vice versa and also suggests that the DIB re-assemblies overall have  
20 241 additional content. This finding is reinforced by higher unique *k*-mer content found in the DIB  
21 242 re-assemblies compared to NCGR, where more than 95% of the samples had more unique *k*-mers  
22 243 in the DIB re-assemblies compared to NCGR assemblies (Figure 4).  
23 244

24 245 To investigate whether the new sequence content was genuine, we examined two different  
25 246 metrics that take into account the biological quality of the assemblies. First, the estimated content  
26 247 of open reading frames (ORFs), or coding regions, across contigs was quantified. Though DIB  
27 248 re-assemblies had more contigs, the ORF content is similar to the original assemblies, with a  
28 249 mean of  $81.8 \pm 9.9\%$  ORF content in DIB re-assemblies and  $76.7 \pm 10.1\%$  ORF content in the  
29 250 NCGR assemblies. Nonetheless, ORF content in DIB re-assemblies was slightly higher than  
30 251 NCGR assemblies for 95% of the samples (Figure 5 A,B), although DIB re-assemblies had  
31 252 significantly higher ORF content ( $p < 0.001$ ,  $D = 2681$ ). Secondly, when the assemblies were  
32 253 queried against the eukaryotic BUSCO database [37], the percentages of BUSCO eukaryotic  
33 254 matches in the DIB re-assemblies ( $63 \pm 18.6\%$ ) were less significantly different compared to the  
34 255 original NCGR assemblies ( $65 \pm 19.1\%$ ) ( $p = 0.001873$ ,  $D = 0.10291$ ) (Figure 5 C,D). Thus,  
35 256 although the number of contigs and amount of content was increased in the DIB re-assemblies  
36 257 compared to the NCGR assemblies, the ORF content and contigs matching with the BUSCO  
37 258 eukaryotic (Figure 5 C,D) and protistan (Supplemental Figure 3) databases did not decrease,  
38 259 suggesting that the extra content contained similar proportions of ORFs and BUSCO annotations  
39 260 and, therefore, might be biologically meaningful.  
40 261

41 262 Following annotation by the dammit pipeline (Scott 2016),  $91 \pm 1.6\%$  of the contigs in the DIB  
42 263 re-assemblies had positive matches with sequence content in the databases queried (Pfam, Rfam,  
43 264 and OrthoDB), with  $48 \pm 0.9\%$  of those containing unique gene names (the remaining are  
44 265 fragments of the same gene). Of those annotations,  $7.8 \pm 0.2\%$  were identified as novel  
45 266 compared to the NCGR 'nt' assemblies, determined by a "false" CRBB result (Figure 6).  
46 267 Additionally, the number of unique gene names in DIB re-assemblies were higher in 97% of the  
47 268 samples compared to NCGR assemblies, suggesting an increase in genic content (Figure 7).  
48 269

49 270 Novel contigs in the DIB re-assemblies likely represent a combination of unique annotations,  
50 271 allelic variants and alternatively spliced isoforms. For example, "F0XV46\_GROCL",  
51  
52  
53  
54  
55  
56  
57  
58  
59  
60  
61  
62  
63  
64  
65

1  
2  
3  
4 272 "Helicase\_C", "ODR4-like", "PsaA\_PsaB", and "Metazoa\_SRP" are novel gene names found  
5 273 annotated in the DIB re-assembly of the sample MMETSP1473 (*Stichococcus* sp.) that were  
6 274 absent in the NCGR assembly of this same sample. Other gene names, for example  
7 275 "Pkinase\_Tyr", "Bromodomain", and "DnaJ", are found in both the NCGR and DIB assemblies,  
8 276 but are identified as novel contigs based on negative CRBB results in the DIB re-assembly of  
9 277 sample MMETSP1473 compared to the NCGR reference.  
10  
11

12 278  
13 279 *Assembly metrics varied by taxonomic group being assembled.*  
14 280

15 281 To examine systematic taxonomic differences in the assemblies, metrics for content and  
16 282 assembly quality were assessed (Figure 8). Metrics were grouped by the top eight most  
17 283 represented phyla in the MMETSP data set as follows: Bacillariophyta (N=173), Dinophyta  
18 284 (N=114), Ochrophyta (N=73), Chlorophyta (N=62), Haptophyta (N=61), Ciliophora (N=25),  
19 285 Cryptophyta (N=22) and Others (N=130).  
20 286

21 287 While there were no major differences between the phyla in the number of input reads (Figure 8  
22 288 A), the Dinoflagellates (Dinophyta) had significantly different (higher) contigs ( $p < 0.01$ ), unique  
23 289  $k$ -mers ( $p < 0.001$ ), and % ORF ( $p < 0.001$ ) compared to than other groups (Figure 8 B,C,D), and  
24 290 assemblies from Ciliates (Ciliophora) had lower % ORF ( $p < 0.001$ ) (Figure 8 D).  
25 291  
26 292

## 27 293 **Discussion**

28 294 *DIB re-assemblies contained the majority of the previously-assembled contigs.*  
29 295

30 296 We used a different pipeline than the original one used to create the NCGR assemblies, in part  
31 297 because new software was available [8] and in part because of new trimming guidelines [27]. We  
32 298 had no *a priori* expectation for the similarity of the results, yet we found that in the majority of  
33 299 cases the new DIB re-assemblies included substantial portions of the previous NCGR  
34 300 assemblies. Moreover, both the fraction of contigs with ORFs and the mean percentage of  
35 301 BUSCO matches were similar between the two assemblies, suggesting that both pipelines  
36 302 yielded equally valid contigs, even though the NCGR assemblies were less sensitive.  
37 303

38 304 *Reassembly with new tools can yield new results.*  
39 305

40 306 Evaluation with quality metrics suggested that the DIB re-assemblies were more inclusive than  
41 307 the NCGR assemblies. The Transrate scores in the DIB re-assemblies compared to the NCGR  
42 308 'nt' assemblies were significantly lower, indicating that the NCGR 'nt' assemblies had better  
43 309 overall read inclusion in the assembled contigs whereas the DIB assemblies had higher Transrate  
44 310 scores than the NCGR 'cds' version. This suggests that the NCGR 'cds' version, which was  
45 311 post-processed to only include coding sequence content, was missing information originally in  
46 312 the quality-trimmed reads. The Transrate score [50] is one of the few metrics available for  
47 313 evaluating the 'quality' of a *de novo* transcriptome. It is similar to the DETONATE RSEM-  
48 314 EVAL score in that it returns a metric indicating how well the assembly is supported by the read  
49 315 data [57]. Metrics directly evaluating the underlying de Bruijn graph data structure used to  
50 316 produce the assembled contigs may be better evaluators of assembly quality in the future. Here,  
51 317 the DIB re-assemblies, which used the Trinity *de novo* assembly software, typically contained  
52 318 more  $k$ -mers, more annotated transcripts, and more unique gene names than the NCGR  
53  
54  
55  
56  
57  
58  
59  
60  
61  
62  
63  
64  
65

1  
2  
3  
4 319 assemblies. These points all suggest that additional content in these re-assemblies might be  
5 320 biologically meaningful and that these re-assemblies provide new content not available in the  
6 321 previous NCGR assemblies. Since contigs are probabilistic predictions made by assembly  
7 322 software for full-length transcripts [57], ‘final’ reference assemblies are approximations of the  
8 323 full set of transcripts in the transcriptome. Results from this study suggest that achieving the  
9 324 ‘ideal’ reference transcriptome is like chasing a moving target and that these predictions may  
10 325 continue to improve given updated tools in the future.  
11 326

12 327 The evaluation metrics described here serve as a framework for better contextualizing the quality  
13 328 of protistan transcriptomes. For some species and strains in the MMETSP data set, these data  
14 329 represent the first nucleic acid sequence information available [31].  
15 330

16 331 *Automated and programmable pipelines can be used to process arbitrarily many RNAseq*  
17 332 *samples.*  
18 333

19 334 The automated and programmable nature of this pipeline was useful for processing large data  
20 335 sets like the MMETSP as it allowed for batch processing of the entire collection, including re-  
21 336 analysis when new tools or new samples become available (see op-ed Alexander et al. 2018).  
22 337 During the course of this project, we ran four re-assemblies of the MMETSP data set as versions  
23 338 of the component tools were updated. Each re-analysis required only a single command and  
24 339 approximately half a CPU-year of compute. New Trinity versions were released (Supplemental  
25 340 Notebook 2) The value of programmable automation is clear when new data sets become  
26 341 available, tools are updated, or many tools are compared in benchmark studies. Despite this, few  
27 342 assembly efforts completely automate their process, perhaps because the up-front cost of doing  
28 343 so is high compared to the size of the dataset typically being analyzed.  
29 344

30 345 *Analyzing many samples using a common pipeline identifies taxon-specific trends.*  
31 346

32 347 The MMETSP dataset presents an opportunity to examine transcriptome qualities for hundreds  
33 348 of taxonomically diverse species spanning a wide array of protistan lineages. This is among the  
34 349 largest set of diverse RNAseq data to be sequenced. In comparison, the Assemblathon2 project  
35 350 compared genome assembly pipelines using data from three vertebrate species [59]. The BUSCO  
36 351 paper assessed 70 genomes and 96 transcriptomes representing groups of diverse species  
37 352 (vertebrates, arthropods, other metazoans, fungi) [52]. Other benchmarking studies have  
38 353 examined transcriptome qualities for samples representing dozens of species from different  
39 354 taxonomic groupings [57,58]. A study with a more restricted evolutionary analysis of 15 plant  
40 355 and animals species [58] found no evidence of taxonomic trend in assembly quality but did find  
41 356 evidence of differences between assembly software packages [58].  
42 357

43 358 With the MMETSP data set, we show that comparison of assembly evaluation metrics across this  
44 359 diversity provides not only a baseline for assembly performance, but also highlights particular  
45 360 metrics which are unique within some taxonomic groups. For example, the phyla Ciliophora had  
46 361 a significantly lower percentage of ORFs compared to other phyla. This is supported by recent  
47 362 work which has found that ciliates have an alternative triplet codon dictionary, with codons  
48 363 normally encoding STOP serving a different purpose [37–39], thus application of typical ORF  
49 364 finding tools fail to identify ORFs accurately in Ciliophora. Additionally, Dinophyta data sets  
50 365 had a significantly higher number of unique *k*-mers and total contigs in assemblies compared to  
51  
52  
53  
54  
55  
56  
57  
58  
59  
60  
61  
62  
63  
64  
65

1  
2  
3  
4 366 the assemblies from other data sets, despite having the same number of input reads. Such a  
5 367 finding supports previous evidence from studies showing that large gene families are  
6 368 constitutively expressed in Dinophyta [60].  
8 369

9 370 In future development of *de novo* transcriptome assembly software, the incorporation of phylum-  
10 371 specific information may be useful in improving the overall quality of assemblies for different  
11 372 taxa. Phylogenetic trends are important to consider in the assessment of transcriptome quality,  
12 373 given that the assemblies from Dinophyta and Ciliophora are distinguished from other  
13 374 assemblies by some metrics. Applying domain-specific knowledge, such as specialized  
14 375 transcriptional features in a given phyla, in combination with other evaluation metrics can help to  
15 376 evaluate whether a transcriptome is of good quality or “finished” enough to serve as a high  
16 377 quality reference to answer the biological questions of interest.  
19 378

## 20 379 **Conclusion**

21 380  
22 381 As the rate of sequencing data generation continues to increase, efforts to programmatically  
23 382 automate the processing and evaluation of sequence data will become increasingly important.  
24 383 Ultimately, the goal in generating *de novo* transcriptomes is to create the best possible reference  
25 384 against which downstream analyses can be accurately based. This study demonstrated that re-  
26 385 analysis of old data with new tools and methods improved the quality of the reference assembly  
27 386 through an expansion of the gene catalogue of the dataset. Notably, these improvements arose  
28 387 without further experimentation or sequencing.  
31 388

32 389 With the growing volume of nucleic acid data in centralized and de-centralized repositories,  
33 390 streamlining methods into pipelines will not only enhance the reproducibility of future analyses,  
34 391 but will facilitate inter-comparisons amongst datasets from similar and diverse. Automation tools  
35 392 were key in successfully processing and analyzing this large collection of 678 samples.  
37 393

## 38 394 **Acknowledgements**

39 395  
40 396 Camille Scott, Luiz Irber, Daniel Standage, and other members of the Data Intensive Biology lab  
41 397 at UC Davis provided helpful assistance with troubleshooting the assembly, annotation and  
42 398 evaluation pipeline. Funding was provided from the Gordon and Betty Moore Foundation under  
43 399 award number GBMF4551 to CTB. Scripts were tested and run on the MSU HPCC and NSF-  
44 400 XSEDE Jetstream cloud platform with allocation TG-BIO160028.  
47 401  
48 402  
49  
50  
51  
52  
53  
54  
55  
56  
57  
58  
59  
60  
61  
62  
63  
64  
65

## References

1. Geniza M, Jaiswal P. Tools for building *de novo* transcriptome assembly. *Curr. Plant Biol.* 2017;11–12:41–5.
2. Tulin S, Aguiar D, Istrail S, Smith J. A quantitative reference transcriptome for *Nematostella vectensis* early embryonic development: A pipeline for *de novo* assembly in emerging model systems. *Evodevo.* 2013;4.
3. Mittal VK, McDonald JF. De novo assembly and characterization of breast cancer transcriptomes identifies large numbers of novel fusion-gene transcripts of potential functional significance. *BMC Med. Genomics.* 2017;10:53.
4. Yang S, Liu H-D, Qiang Z, Zhang H-J, Zhi-Dong Z, Li Y-D, et al. ScienceDirect High-throughput sequencing of highbush blueberry transcriptome and analysis of basic helix-loop-helix transcription factors. *J. Integr. Agric.* 2017;16:591–604.
5. Suárez-Vega A, Gutiérrez-Gil B, Klopp C, Tosser-Klopp G, Arranz J-J. Comprehensive RNA-Seq profiling to evaluate lactating sheep mammary gland transcriptome. *Sci. Data.* 2016;3:160051.
6. Carruthers M, Yurchenko AA, Augley JJ, Adams CE, Herzyk P, Elmer KR. De novo transcriptome assembly, annotation and comparison of four ecological and evolutionary model salmonid fish species. *BMC Genomics.* 2018;19.
7. Mansour TA, Rosenthal JJC, Brown CT, Roberson LM. Transcriptome of the Caribbean stony coral *Porites astreoides* from three developmental stages. *Gigascience.* 2016;5.
8. Frischkorn KR, Harke MJ, Gobler CJ, Dyhrman ST. De novo assembly of *Aureococcus anophagefferens* transcriptomes reveals diverse responses to the low nutrient and low light conditions present during blooms. *Front. Microbiol. Frontiers;* 2014;5:375.
9. Mansour TA, Scott EY, Finno CJ, Bellone RR, Mienaltowski MJ, Penedo MC, et al. Tissue resolved, gene structure refined equine transcriptome. *BMC Genomics.* 2017;18:103.
10. Gonzalez VL, Andrade SCS, Bieler R, Collins TM, Dunn CW, Mikkelsen PM, et al. A phylogenetic backbone for Bivalvia: an RNA-seq approach. *Proc. R. Soc. B Biol. Sci.* 2015;282:20142332–20142332.
11. Müller M, Seifert S, Lübke T, Leuschner C, Finkeldey R. *De novo* transcriptome assembly and analysis of differential gene expression in response to drought in European beech. *PLoS One.* 2017;12:e0184167.
12. Heikkinen LK, Kesäniemi JE, Knott KE. *De novo* transcriptome assembly and developmental mode specific gene expression of *Pygospio elegans*. *Evol. Dev.* 2017;19:205–17.
13. Li F, Wang L, Lan Q, Yang H, Li Y, Liu X, et al. RNA-Seq analysis and gene discovery of *Andrias davidianus* using Illumina short read sequencing. *PLoS One.* 2015;10:e0123730.
14. Yu J, Lou Y, Zhao A. Transcriptome analysis of follicles reveals the importance of autophagy and hormones in regulating broodiness of Zhedong white goose. *Sci. Rep.* 2016;6:36877.
15. Seo M, Kim K, Yoon J, Jeong JY, Lee HJ, Cho S, et al. RNA-seq analysis for detecting quantitative trait-associated genes. *Sci. Rep.* 2016;6:24375.
16. Pedrotty DM, Morley MP, Cappola TP. Transcriptomic biomarkers of cardiovascular disease. *Prog. Cardiovasc. Dis.* 2012;55:64–9.
17. Conesa A, Madrigal P, Tarazona S, Gomez-Cabrero D, Cervera A, McPherson A, et al. A survey of best practices for RNA-seq data analysis. *Genome Biol.* 2016;17:13.
18. Grabherr MG, Haas BJ, Yassour M, Levin JZ, Thompson DA, Amit I, et al. Full-length

- transcriptome assembly from RNA-Seq data without a reference genome. *Nat. Biotechnol.* 2011;29:644–52.
19. Xie Y, Wu G, Tang J, Luo R, Patterson J, Liu S, et al. SOAPdenovo-Trans: De novo transcriptome assembly with short RNA-Seq reads. *Bioinformatics.* 2014;30:1660–6.
20. Robertson G, Schein J, Chiu R, Corbett R, Field M, Jackman SD, et al. *De novo* assembly and analysis of RNA-seq data. *Nat. Methods.* 2010;7:909–12.
21. Schulz MH, Zerbino DR, Vingron M, Birney E. Oases: Robust *de novo* RNA-seq assembly across the dynamic range of expression levels. *Bioinformatics.* 2012;28:1086–92.
22. Bankevich A, Nurk S, Antipov D, Gurevich AA, Dvorkin M, Kulikov AS, et al. SPAdes: A new genome assembly algorithm and its applications to single-cell sequencing. *J. Comput. Biol.* 2012;19:455–77.
23. Peng Y, Leung HCM, Yiu SM, Lv MJ, Zhu XG, Chin FYL. IDBA-tran: A more robust *de novo* de Bruijn graph assembler for transcriptomes with uneven expression levels. *Bioinformatics.* 2013. p. i326–34.
24. Kannan S, Hui J, Mazooji K. Shannon : An information-optimal *de novo* RNA-Seq Assembler. *bioRxiv.* 2016;1–14.
25. Chang Z, Wang. Z, Li G. The impacts of read length and transcriptome complexity for *de novo* assembly: A simulation study. *PLoS One. Public Library of Science;* 2014;9:e94825.
26. Solomon B, Kingsford C. Fast search of thousands of short-read sequencing experiments. *Nat. Biotechnol.* 2016;34:300–2.
27. Brown CT, Scott C, Crusoe MR, Sheneman L, Rosenthal J, Howe A. khmer-protocols 0.8.4 documentation. 2013 [cited 2017 Oct 17]; Available from: [https://figshare.com/articles/khmer\\_protocols\\_0\\_8\\_3\\_documentation/878460](https://figshare.com/articles/khmer_protocols_0_8_3_documentation/878460)
28. Bolger AM, Lohse M, Usadel B. Trimmomatic: A flexible trimmer for Illumina sequence data. *Bioinformatics.* 2014;30:2114–20.
29. Crusoe MR, Alameldin HF, Awad S, Boucher E, Caldwell A, Cartwright R, et al. The khmer software package: enabling efficient nucleotide sequence analysis. *F1000Research* [Internet]. 2015 [cited 2017 Oct 17];4. Available from: <http://f1000research.com/articles/4-900/v1>
30. Zhang Q, Awad S, Brown C. Crossing the streams: a framework for streaming analysis of short DNA sequencing reads. *PeeJ Prepr.* 2015;0–27.
31. Keeling PJ, Burki F, Wilcox HM, Allam B, Allen EE, Amaral-Zettler LA, et al. The Marine Microbial Eukaryote Transcriptome Sequencing Project (MMETSP): Illuminating the Functional Diversity of Eukaryotic Life in the Oceans through Transcriptome Sequencing. Roberts RG, editor. *PLoS Biol. Public Library of Science;* 2014;12:e1001889.
32. Caron DA, Alexander H, Allen AE, Archibald JM, Armbrust EV, Bachy C, et al. Probing the evolution, ecology and physiology of marine protists using transcriptomics. *Nat. Rev. Microbiol.* 2016;15:6–20.
33. Durkin CA, Koester JA, Bender SJ, Armbrust EV. The evolution of silicon transporters in diatoms. *J. Phycol.* 2016;52:716–31.
34. Groussman RD, Parker MS, Armbrust EV. Diversity and evolutionary history of iron metabolism genes in diatoms. *PLoS One.* 2015;10:e0129081.
35. Harke MJ, Juhl AR, Haley ST, Alexander H, Dyhrman ST. Conserved transcriptional responses to nutrient stress in bloom-forming algae. *Front. Microbiol. Frontiers;* 2017;8:1279.
36. Koid AE, Liu Z, Terrado R, Jones AC, Caron DA, Heidelberg KB. Comparative transcriptome analysis of four prymnesiophyte algae. *PLoS One.* 2014;9:e97801.
37. Alkalaeva E, Mikhailova T. Reassigning stop codons via translation termination: How a few

- 1  
2  
3  
4 eukaryotes broke the dogma. *BioEssays*. 2017;39:1600213.
- 5 38. Heaphy SM, Mariotti M, Gladyshev VN, Atkins JF, Baranov P V. Novel ciliate genetic code  
6 variants including the reassignment of all three stop codons to sense codons in *Condylostoma*  
7 *magnum*. *Mol. Biol. Evol.* 2016;33:2885–9.
- 8 39. Swart EC, Serra V, Petroni G, Nowacki M. Genetic codes with no dedicated stop codon:  
9 context-dependent translation termination. *Cell*. 2016;166:691–702.
- 10 40. Alexander H, Jenkins BD, Rynearson TA, Dyhrman ST. Metatranscriptome analyses indicate  
11 resource partitioning between diatoms in the field. *Proc. Natl. Acad. Sci.* 2015;112:E2182–90.
- 12 41. Alexander H, Rouco M, Haley ST, Wilson ST, Karl DM, Dyhrman ST. Functional group-  
13 specific traits drive phytoplankton dynamics in the oligotrophic ocean. *Proc. Natl. Acad. Sci.*  
14 2015;112:E5972–9.
- 15 42. Gong W, Browne J, Hall N, Schruth D, Paerl H, Marchetti A. Molecular insights into a  
16 dinoflagellate bloom. *ISME J.* 2017;11:439–52.
- 17 43. Lowe EK, Swalla BJ, Brown CT. Evaluating a lightweight transcriptome assembly pipeline  
18 on two closely related ascidian species. *PeerJ Prepr.* 2014;2:e505v1.
- 19 44. Leinonen R, Sugawara H, Shumway M. The sequence read archive. *Nucleic Acids Res.*  
20 2011;39:D19–21.
- 21 45. Ewels P, Magnusson M, Lundin S, Käller M. MultiQC: Summarize analysis results for  
22 multiple tools and samples in a single report. *Bioinformatics.* 2016;32:3047–8.
- 23 46. MacManes MD. On the optimal trimming of high-throughput mRNA sequence data. *Front.*  
24 *Genet.* 2014;5:13.
- 25 47. Finn RD, Coggill P, Eberhardt RY, Eddy SR, Mistry J, Mitchell AL, et al. The Pfam protein  
26 families database: Towards a more sustainable future. *Nucleic Acids Res.* 2016;44:D279–85.
- 27 48. Gardner PP, Daub J, Tate JG, Nawrocki EP, Kolbe DL, Lindgreen S, et al. Rfam: updates to  
28 the RNA families database. *Nucleic Acids Res. Oxford University Press;* 2009;37:D136–40.
- 29 49. Zdobnov EM, Tegenfeldt F, Kuznetsov D, Waterhouse RM, Simao FA, Ioannidis P, et al.  
30 OrthoDB v9.1: Cataloging evolutionary and functional annotations for animal, fungal, plant,  
31 archaeal, bacterial and viral orthologs. *Nucleic Acids Res.* 2017;45:D744–9.
- 32 50. Smith-Unna R, Bournnell C, Patro R, Hibberd JM, Kelly S. TransRate: Reference-free  
33 quality assessment of *de novo* transcriptome assemblies. *Genome Res.* 2016;26:1134–44.
- 34 51. Aubry S, Kelly S, Kumpers BMC, Smith-Unna RD, Hibberd JM. Deep evolutionary  
35 comparison of gene expression identifies parallel recruitment of trans-factors in two independent  
36 origins of C4 photosynthesis. *PLoS Genet.* 2014;10:e1004365.
- 37 52. Simão FA, Waterhouse RM, Ioannidis P, Kriventseva E V., Zdobnov EM. BUSCO:  
38 Assessing genome assembly and annotation completeness with single-copy orthologs.  
39 *Bioinformatics.* 2015;31:3210–2.
- 40 53. Irber Junior LC, Brown CT. Efficient cardinality estimation for k-mers in large DNA  
41 sequencing data sets. *bioRxiv.* 2016;56846.
- 42 54. Scott C. dammit: an open and accessible *de novo* transcriptome annotator. in prep. [Internet].  
43 2016; Available from: [www.camillescott.org/dammit](http://www.camillescott.org/dammit)
- 44 55. Johnson, L; Alexander, H; Brown CT. Marine Microbial Eukaryotic Transcriptome  
45 Sequencing Project, re-assemblies [Internet]. 2017. Available from:  
46 <https://doi.org/10.6084/m9.figshare.3840153.v6>
- 47 56. Johnson LK, Alexander H, Brown CT. MMETSP re-assemblies. 2018; Available from:  
48 <https://doi.org/10.5281/zenodo.1212585>
- 49 57. Li B, Fillmore N, Bai Y, Collins M, Thomson JA, Stewart R, et al. Evaluation of *de novo*  
50  
51  
52  
53  
54  
55  
56  
57  
58  
59  
60  
61  
62  
63  
64  
65

1  
2  
3  
4  
5  
6  
7  
8  
9  
10  
11  
12  
13  
14  
15  
16  
17  
18  
19  
20  
21  
22  
23  
24  
25  
26  
27  
28  
29  
30  
31  
32  
33  
34  
35  
36  
37  
38  
39  
40  
41  
42  
43  
44  
45  
46  
47  
48  
49  
50  
51  
52  
53  
54  
55  
56  
57  
58  
59  
60  
61  
62  
63  
64  
65

transcriptome assemblies from RNA-Seq data. *Genome Biol.* 2014;15:553.

58. MacManes MD. The Oyster River Protocol: A multi assembler and kmer approach for *de novo* transcriptome assembly. *bioRxiv.* 2017;177253.

59. Bradnam KR, Fass JN, Alexandrov A, Baranay P, Bechner M, Birol I, et al. Assemblathon 2: Evaluating de novo methods of genome assembly in three vertebrate species. *Gigascience.* 2013;2:10.

60. Aranda M, Li Y, Liew YJ, Baumgarten S, Simakov O, Wilson MC, et al. Genomes of coral dinoflagellate symbionts highlight evolutionary adaptations conducive to a symbiotic lifestyle. *Sci. Rep.* 2016;6:39734.



1  
2  
3  
4  
5  
6  
7  
8  
9  
10  
11  
12  
13  
14  
15  
16  
17  
18  
19  
20  
21  
22  
23  
24  
25  
26  
27  
28  
29  
30  
31  
32  
33  
34  
35  
36  
37  
38  
39  
40  
41  
42  
43  
44  
45  
46  
47  
48  
49  
50  
51  
52  
53  
54  
55  
56  
57  
58  
59  
60  
61  
62  
63  
64  
65

| <b>Quality Metric</b>              | <b>Higher in NCGR</b> | <b>Higher in DIB</b> |
|------------------------------------|-----------------------|----------------------|
| Transrate score, “cds”             | 44                    | 583                  |
| Transrate score, “nt”              | 495                   | 143                  |
| Mean ORF %                         | 42                    | 596                  |
| Percentage of references with CRBB | 100                   | 538                  |
| Number of contigs                  | 12                    | 626                  |

Table 1. Number of assemblies with higher values in NCGR or DIB assemblies for each quality metric.

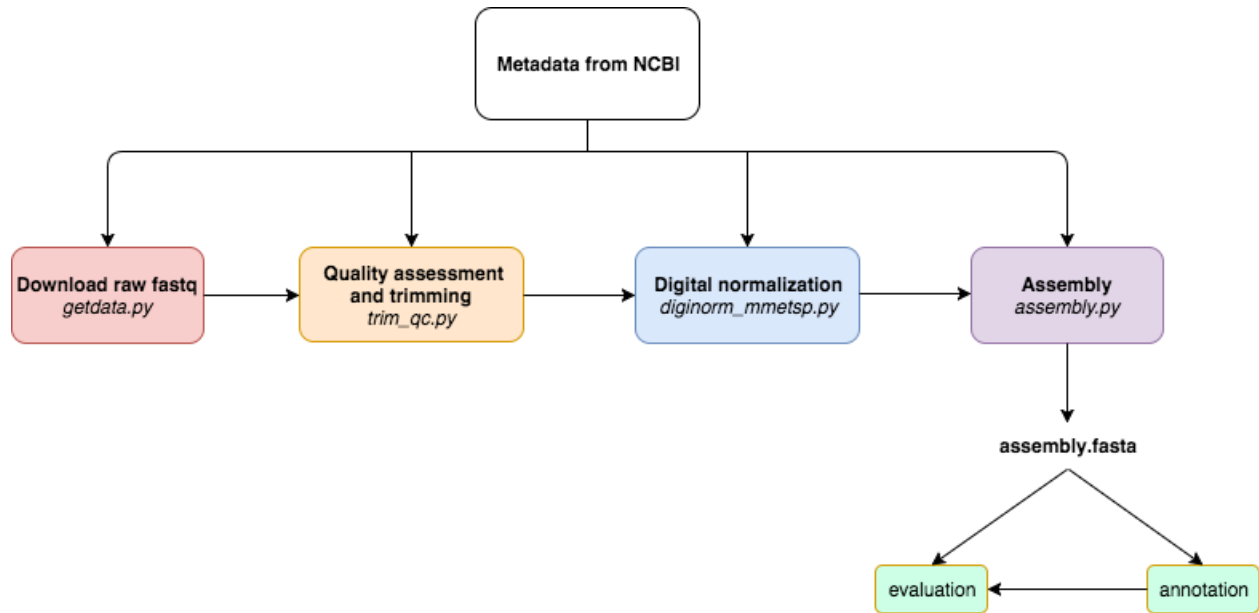

Figure 1. A programmatically automated *de novo* transcriptome assembly pipeline was developed for this study. Metadata in the SraRunInfo.csv file downloaded from NCBI was used as input for each step of the pipeline to indicate which samples were processed. The steps of the pipeline are as follows: download raw fastq data with the fastq-dump script in the SRA Toolkit, perform quality assessment with FastQC and trim residual Illumina adapters and low quality bases ( $Q < 2$ ) with Trimmomatic, do digital normalization with khmer version 2.0, and perform *de novo* transcriptome assembly with Trinity. If a process was terminated, the automated nature of this pipeline allowed for the last process to be run again without starting the pipeline over. In the future, if a new sample is added, the pipeline can be run from beginning to end with just new samples, without having to repeat the processing of all samples in the dataset as one batch. If a new tool becomes available, for example a new assembler, it can be substituted in lieu of the original tool used by this pipeline.

1  
2  
3  
4  
5  
6  
7  
8  
9  
10  
11  
12  
13  
14  
15  
16  
17  
18  
19  
20  
21  
22  
23  
24  
25  
26  
27  
28  
29  
30  
31  
32  
33  
34  
35  
36  
37  
38  
39  
40  
41  
42  
43  
44  
45  
46  
47  
48  
49  
50  
51  
52  
53  
54  
55  
56  
57  
58  
59  
60  
61  
62  
63  
64  
65

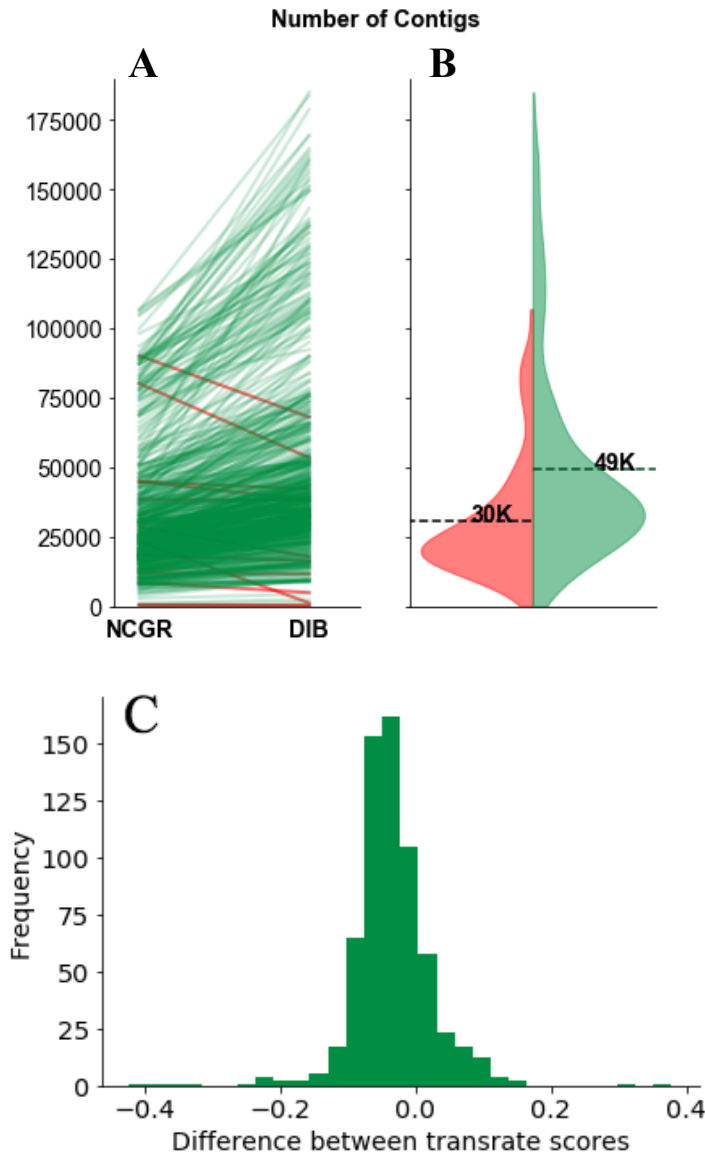

Figure 2. The number of contigs and Transrate quality score for each data set varied between DIB and NCGR assemblies. (A) Slopegraphs show shifts in the number of contigs for each individual sample between the DIB and the NCGR assembly pipelines. Red lines represent values where NCGR was higher than DIB and green lines represent values where DIB was higher than NCGR. (B) Split violin plots show the distribution of the number of contigs in each assembly with the original assemblies from NCGR in red (left) and the DIB re-assemblies and in green (right side of B). (C) The difference in Transrate score between the DIB and NCGR assemblies is shown as a histogram. Negative values on the x-axis indicate that the NCGR assembly had a higher Transrate score and positive values indicate that the DIB assembly had a higher Transrate score.

1  
2  
3  
4  
5  
6  
7  
8  
9  
10  
11  
12  
13  
14  
15  
16  
17  
18  
19  
20  
21  
22  
23  
24  
25  
26  
27  
28  
29  
30  
31  
32  
33  
34  
35  
36  
37  
38  
39  
40  
41  
42  
43  
44  
45  
46  
47  
48  
49  
50  
51  
52  
53  
54  
55  
56  
57  
58  
59  
60  
61  
62  
63  
64  
65

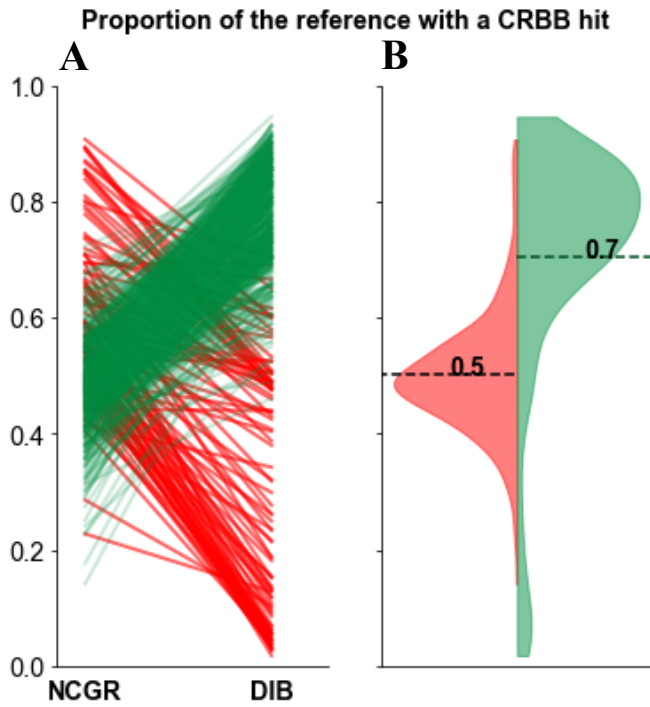

Figure 3. (A) Line plot comparing proportion of CRBB hits between NCGR ‘nt’ assemblies and DIB assemblies between the same samples. (B) Violin plots showing the distribution of the proportion of NCGR transcripts with reciprocal BLAST hits to DIB (red) and the proportion of DIB transcripts with reciprocal BLAST hits to NCGR (green).

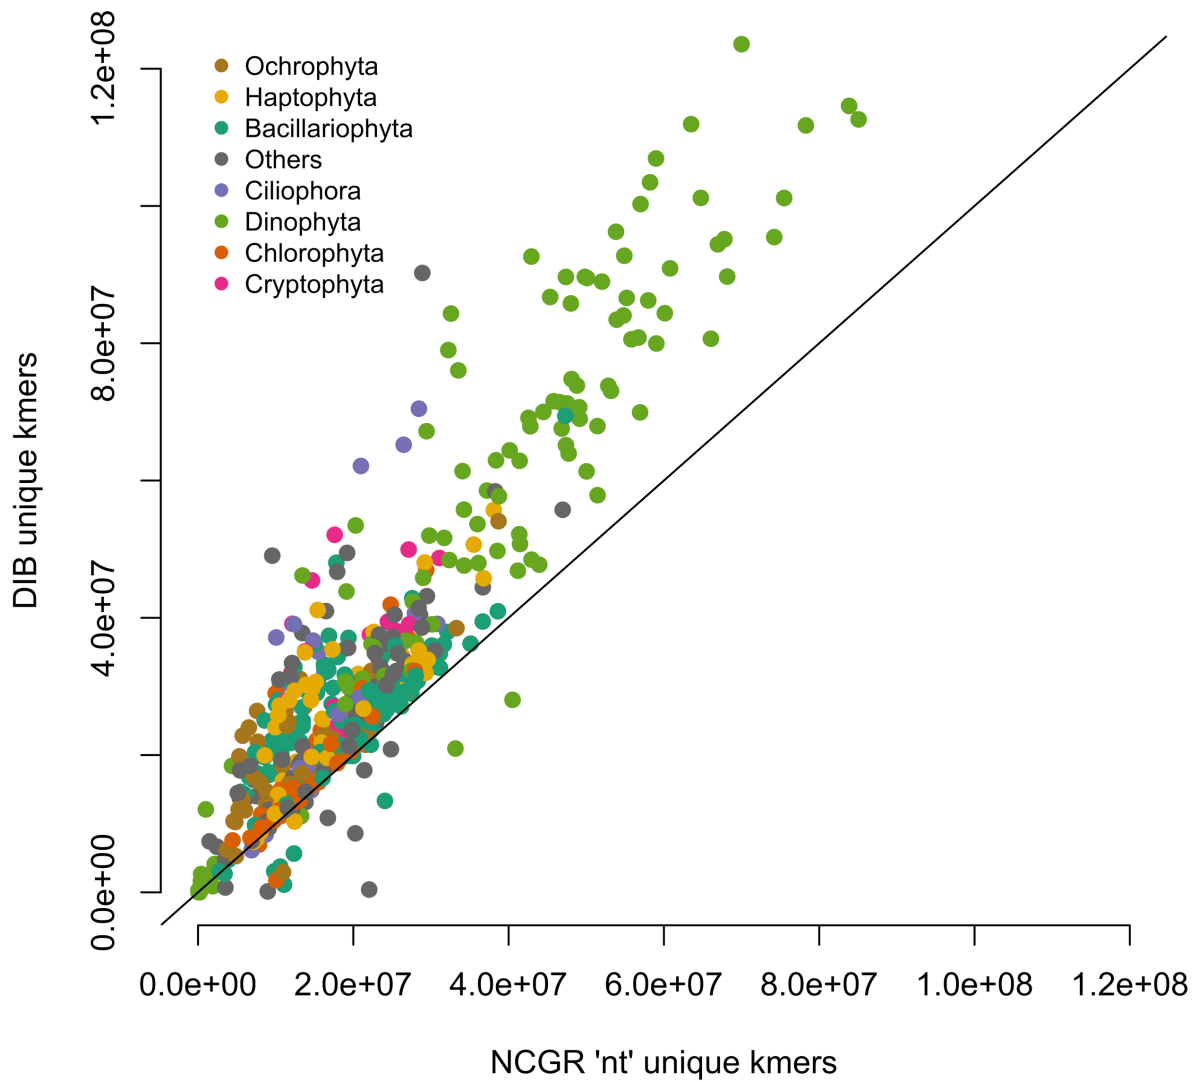

Figure 4. Unique numbers of  $k$ -mers ( $k=25$ ) in seven most represented phyla, calculated with the HyperLogLog function in the khmer software package. DIB re-assemblies were compared to the NCGR 'nt' assemblies along a 1:1 line. Samples are colored based on their phylum level affiliation. More than 95% of the DIB re-assemblies had more unique  $k$ -mers than to the NCGR assembly of the same sample.

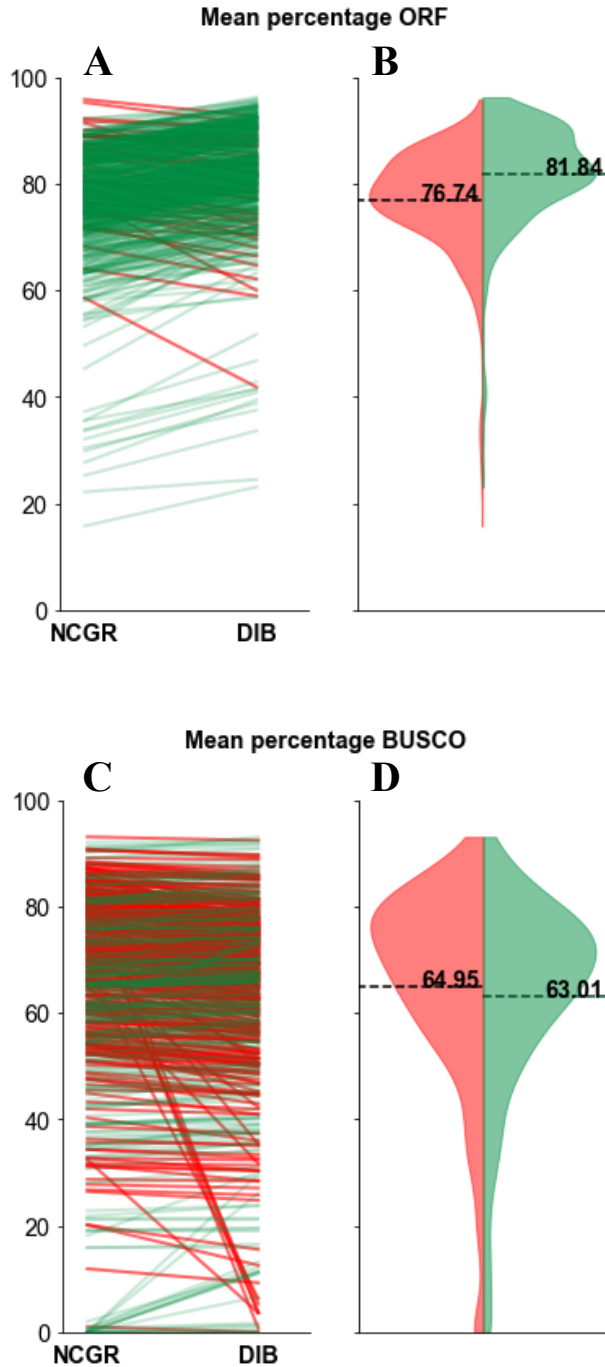

Figure 5. The percentage of contigs with a predicted open reading frame (ORF) (A, B) and the percentage of complete protistan universal single-copy orthologs (BUSCO) recovered in each assembly (C, D). In the green (right side B, D) are the “DIB” re-assemblies and in red (left side of B, D) are the original ‘nt’ assemblies from NCGR. Line plots (A,C) compare values between the DIB and the NCGR ‘nt’ assemblies. Red lines represent values where NCGR was higher than DIB and green lines represent values where DIB was higher than NCGR.

1  
2  
3  
4  
5  
6  
7  
8  
9  
10  
11  
12  
13  
14  
15  
16  
17  
18  
19  
20  
21  
22  
23  
24  
25  
26  
27  
28  
29  
30  
31  
32  
33  
34  
35  
36  
37  
38  
39  
40  
41  
42  
43  
44  
45  
46  
47  
48  
49  
50  
51  
52  
53  
54  
55  
56  
57  
58  
59  
60  
61  
62  
63  
64  
65

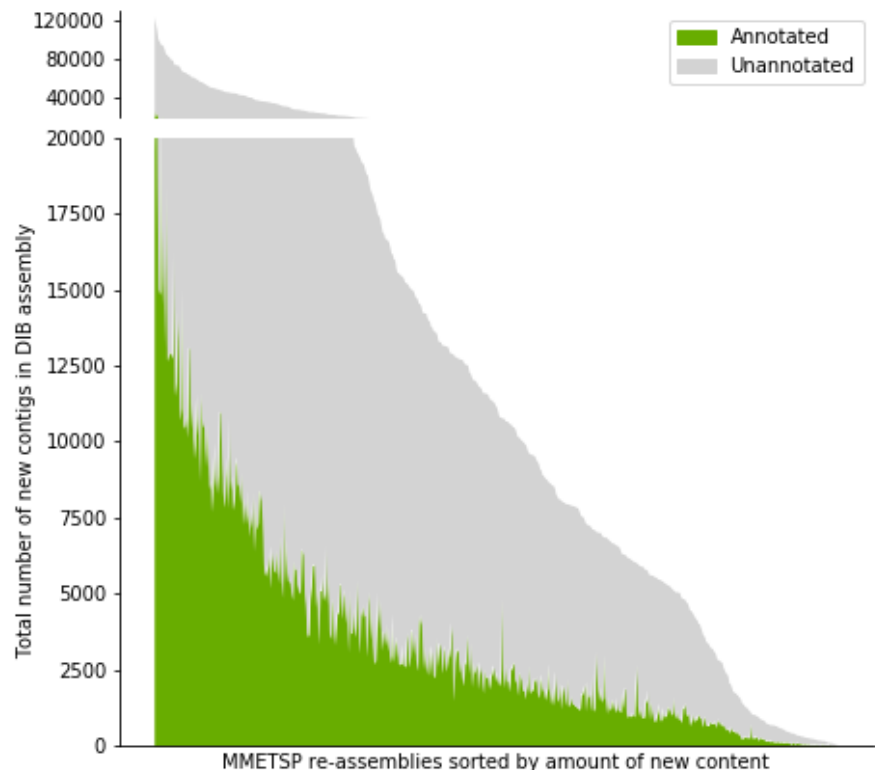

Figure 6. A histogram across MMETSP samples depicting the number of contigs identified as novel in DIB assemblies. These contigs were absent in the NCGR assemblies, based on negative conditional reciprocal best BLAST (CRBB) results. Samples are sorted from highest to lowest number of ‘new’ contigs. The region in gray indicates the number of unannotated contigs present in the DIB re-assemblies, absent from NCGR ‘nt’ assemblies. Highlighted in green are contigs that were annotated with dammit [44] to a gene name in the Pfam, Rfam, or OrthoDB databases, representing the number of contigs unique to the DIB re-assemblies with an annotation.

1  
2  
3  
4  
5  
6  
7  
8  
9  
10  
11  
12  
13  
14  
15  
16  
17  
18  
19  
20  
21  
22  
23  
24  
25  
26  
27  
28  
29  
30  
31  
32  
33  
34  
35  
36  
37  
38  
39  
40  
41  
42  
43  
44  
45  
46  
47  
48  
49  
50  
51  
52  
53  
54  
55  
56  
57  
58  
59  
60  
61  
62  
63  
64  
65

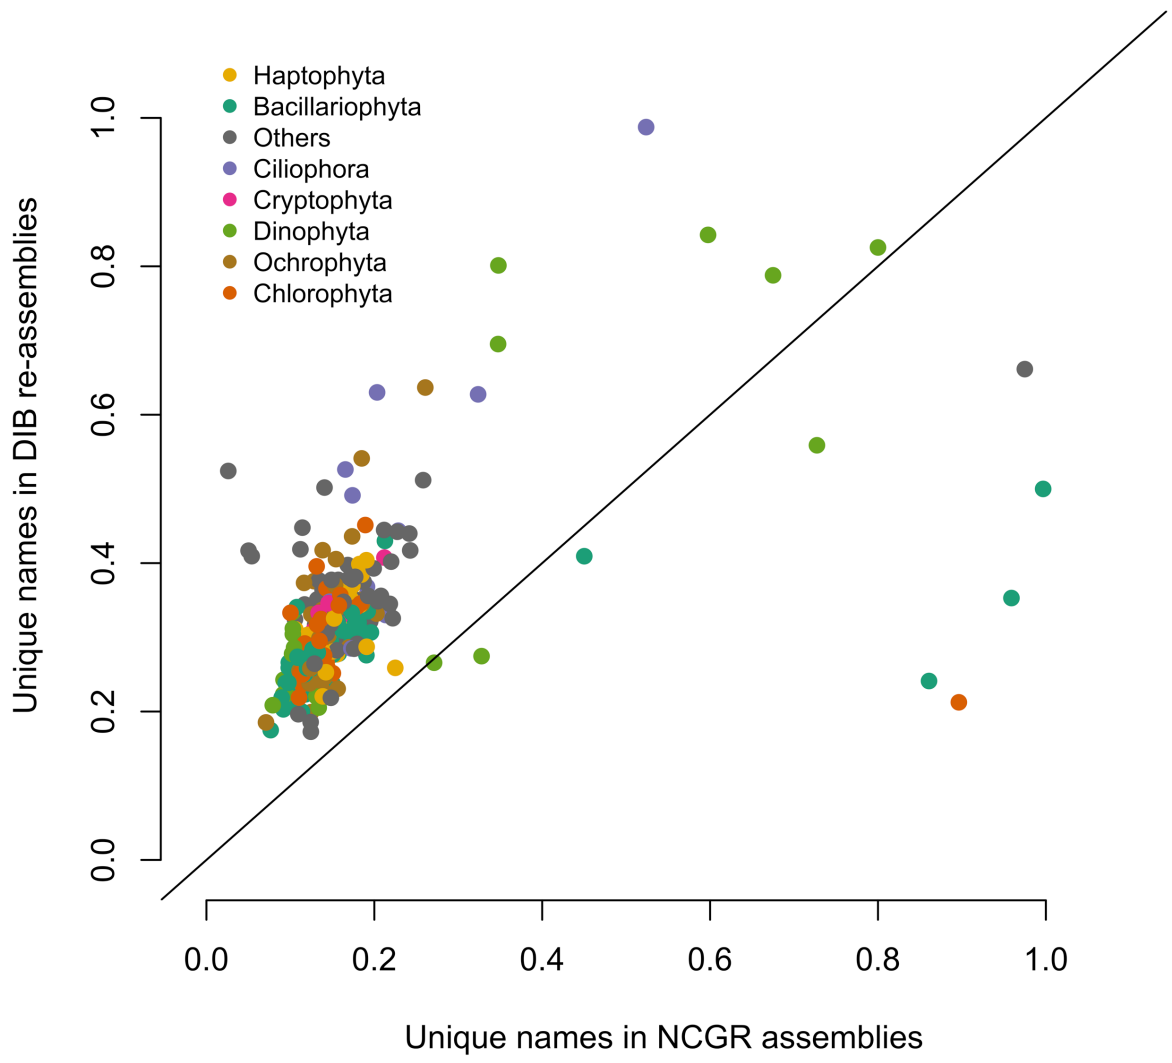

Figure 7. Unique gene names found in a subset (296 samples) of either NCGR ‘nt’ assemblies or DIB re-assemblies but not found in the other assembly, normalized to the number of annotated contigs in each assembly. The line indicates a 1:1 relationship between the unique gene names in DIB and NCGR. More than 97% of the DIB assemblies had more unique gene names than in NCGR assemblies of the same sample.



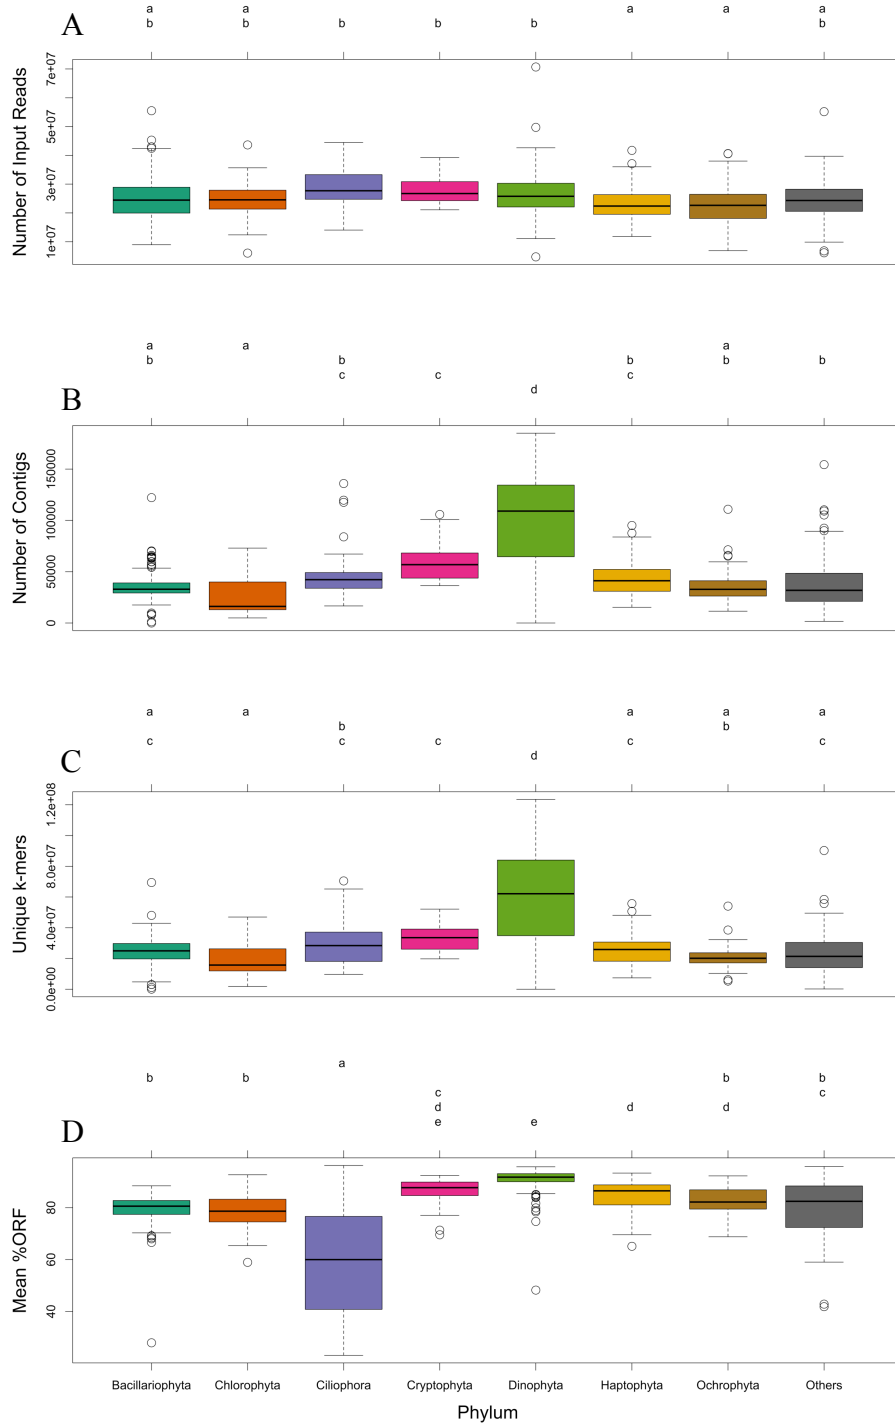

Figure 8. Box-and-whisker plots for the seven most common phyla in the MMETSP dataset, (A) number of input reads, (B) number of contigs in the assembly, (C) unique  $k$ -mers ( $k = 25$ ) in the assembly, (D) mean percentage open reading frames (ORF). Groups sharing a letter in the top margin were generated from Tukey's HSD post-hoc range test of multiple pairwise comparisons used in conjunction with an ANOVA.



Click here to access/download  
**Supplementary Material**  
giga-323576.pdf





Click here to access/download  
**Supplementary Material**  
supp-1.txt





Click here to access/download  
**Supplementary Material**  
supp-2.txt





Click here to access/download  
**Supplementary Material**  
supp-3.html





Click here to access/download  
**Supplementary Material**  
supp-4.html





Click here to access/download  
**Supplementary Material**  
supp-5.pdf





Click here to access/download  
**Supplementary Material**  
supp-6.pdf







Click here to access/download  
**Supplementary Material**  
supp-7.pdf



Supplement: giy158_giga-d-18-00191_original-submission.pdf [file giy158_giga-d-18-00191_original-submission.pdf]
